# Supplementary material for: Fine particulate matter 2.5 exerted its toxicological effect by regulating a new layer, long non-coding RNA
Source: PubMed Central journal article supplement (PMC5570922; doi:10.1038/s41598-017-09818-6), 2017-08-24
Supplement: 41598_2017_9818_MOESM1_ESM.pdf [file 41598_2017_9818_MOESM1_ESM.pdf]

Supplementary information 1

Fine particulate matter 2.5 exerted its toxicological effect by  
regulating a new layer, long non-coding RNA

Qiansheng Huang<sup>a,b</sup>, Yulang Chi<sup>a,b</sup>, Junjun Deng<sup>a,b</sup>, Yiyao Liu<sup>a,b</sup>, Yanyang Lu<sup>a,b</sup>, Jinsheng Chen<sup>a,b\*</sup>,  
Sijun Dong<sup>a,b\*</sup>

a Center for Excellence in Regional Atmospheric Environment, Institute of Urban  
Environment, Chinese Academy of Sciences, Xiamen 361021, China

b Key Laboratory of Urban Environment and Health, Institute of Urban Environment, Chinese  
Academy of Sciences, Xiamen 361021, China

\* Corresponding author. Tel/fax: +86 -592-6190779.

*E-mail address:* [sjdong@iue.ac.cn](mailto:sjdong@iue.ac.cn), [jschen@iue.ac.cn](mailto:jschen@iue.ac.cn)

---

**Table of contents**

Supplementary Material Table S1: Primer sequences used in the realtime RT-PCR.....3

Supplementary Material Table S2: Significantly enriched pathways from differentially expressed mRNA.....4

Supplementary Material Figure S1: Effects of organic extracts from Nanjing and Shanghai PM2.5 on the cell viability by MTT assay.....5

Supplementary Material Figure S2: GO analysis of significantly differentially expressed mRNA between control vs Nanjing; control vs Shanghai.....6

**Table S1** primer sequences used in the realtime RT-PCR

| Genes                                                                 | Nucleotide accession number | Primer sequences used for RT-PCR (5' to 3')               |
|-----------------------------------------------------------------------|-----------------------------|-----------------------------------------------------------|
| n345347                                                               | /                           | F: GATGTTACAGCCTCTGCCTCTGG<br>R: GGATCCCAAGGAGGGAGAAAAGGA |
| n405968                                                               | <i>NR_001458</i>            | F: GCTCCTGGCACTGCAGATAACTT<br>R: GTGCCACCATTAGAGCCATCTCC  |
| n407133                                                               | <i>NR_026545</i>            | F: GCCTGAGCTTGCTCACCTTCAAA<br>R: CCTTGCCTCCTCCACATACTTCG  |
| MALAT1<br>(metastasis associated lung<br>adenocarcinoma transcript 1) | <i>NR_002819</i>            | F: TAGGAAGACAGCAGCAGACAGG<br>R: TTGCTCGCTTGCTCCTCAGT      |
| AFAP1<br>(actin filament associated protein 1)                        | <i>NM_001134647</i>         | F: CCGTGCATCAACGGCTCGCTC<br>R: TTCACAACAGCCGCGGGATCC      |
| AFAP1-AS1<br>(AFAP1 antisense RNA 1)                                  | <i>NR_026892</i>            | F: TCGCTCAATGGAGTGACGGCA<br>R: CGGCTGAGACCGCTGAGAACTT     |
| IL-1 $\beta$<br>(interleukin 1 beta)                                  | <i>NM_000576</i>            | F: GGACAAGCTGAGGAAGATGC<br>R: TCGTTATCCCATGTGTCGAA        |
| IL-6<br>(interleukin 6)                                               | <i>NM_000600</i>            | F: AAATTCGGTACATCCTCGACGG<br>R: GGAAGGTCAGGTTGTTTTCTGC    |
| IL-8<br>(interleukin 8)                                               | <i>NM_000584</i>            | F: GCATAAAGACATACTCCAAACC<br>R: ACTTCTCCACAACCCTCTG       |
| E-cadherin                                                            | <i>NM_004360</i>            | F: GGATGTGCTGGATGTGAATG<br>R: CTGGGCAGTGTAGGATGTGA        |
| N-cadherin                                                            | <i>NM_001308176</i>         | F: CGTGAAGGTTTGCCAGTGT<br>R: GCACAAGGATAAGCAGGATG         |
| HOXB-6<br>(homeobox B6)                                               | <i>NM_018952.4</i>          | F: TATGGTTCCAGAACCGACGCAT<br>R: TCGGCCTGTTTTTCTCCTCCT     |
| GAPDH<br>(Glyceraldehyde-3-<br>phosphate dehydrogenase)               | <i>NM_002046</i>            | F: GGAGAAGGCTGGGGCTCAT<br>R: TGATGGCATGGACTGTGGTC         |

**Table S2** significantly enriched pathways from differentially expressed mRNA  
(control vs Nanjing or control vs Shanghai)  $p < 0.05$

| C vs NJ |                                           | C vs SH    |                                           |            |
|---------|-------------------------------------------|------------|-------------------------------------------|------------|
|         | Name of pathway                           | Pathway ID | Name of pathway                           | Pathway ID |
| 1       | Amoebiasis                                | ko05146    | Amoebiasis                                | ko05146    |
| 2       | Rheumatoid arthritis                      | ko05323    | Chemokine signaling pathway               | ko04062    |
| 3       | Rap1 signaling pathway                    | ko04015    | Type II diabetes mellitus                 | ko04930    |
| 4       | Chagas disease (American trypanosomiasis) | ko05142    | Non-alcoholic fatty liver disease (NAFLD) | ko04932    |
| 5       | Toll-like receptor signaling pathway      | ko04620    | Legionellosis                             | ko05134    |
| 6       | Non-alcoholic fatty liver disease (NAFLD) | ko04932    | Rheumatoid arthritis                      | ko05323    |
| 7       | Melanoma                                  | ko05218    | Ovarian steroidogenesis                   | ko04913    |
| 8       | Legionellosis                             | ko05134    | Jak-STAT signaling pathway                | ko04630    |
| 9       | TNF signaling pathway                     | ko04668    | Apoptosis                                 | ko04210    |
| 10      | PI3K-Akt signaling pathway                | ko04151    | Pertussis                                 | ko05133    |

**Figure S1**

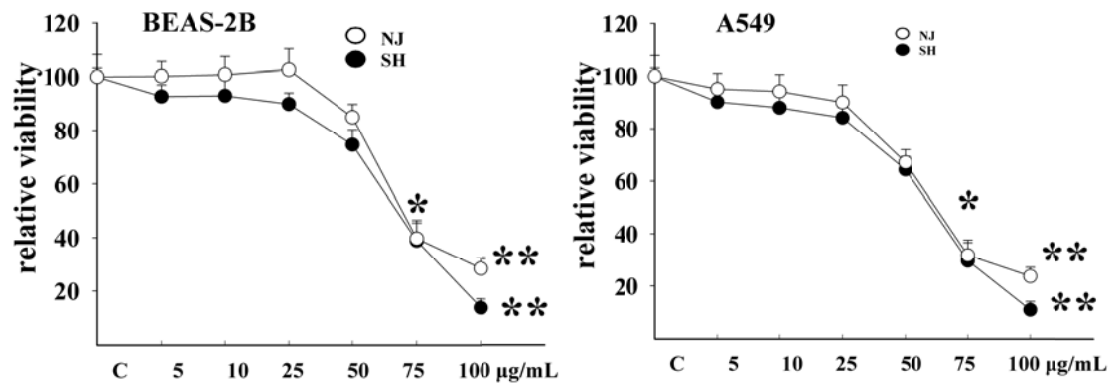

**Figure S1** Effects of organic extracts from Nanjing and Shanghai PM2.5 on the viability of BEAS-2B and A549 cells by MTT assay. (\* $p < 0.05$ , \*\* $p < 0.01$ , \*\*\* $p < 0.001$  vs control)

Figure S2

C vs NJ

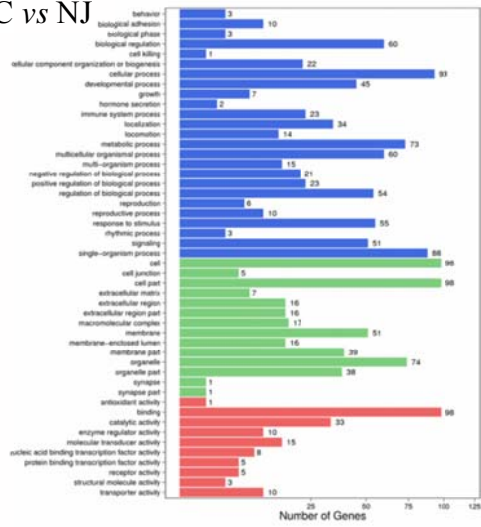

C vs SH

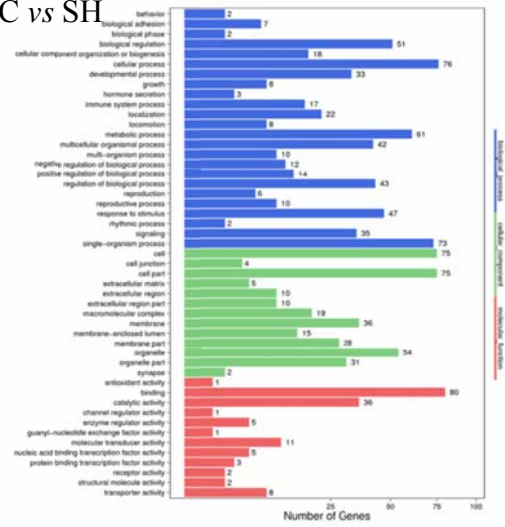

Figure S2 GO analysis of significantly differentially expressed mRNA between control vs Nanjing; control vs Shanghai.
